# Supplementary material for: Molecular scale behavior of xylan during solvent-controlled extraction and precipitation
Source: Royal Society of Chemistry journal article supplement (doi:10.1039/d3cp01385e), 2023-01-01
Supplement: d3cp01385e1.pdf [file d3cp01385e1.pdf]

## **Molecular scale behavior of xylan during solvent-controlled extraction and precipitation**

Qixuan Lin,<sup>a</sup> Qiwen Zhan,<sup>a</sup> Yue Wu,<sup>a</sup> Jianlin Wang,<sup>a</sup> Libo Li,<sup>b</sup> Feng Peng,<sup>c</sup> Feng Xu,<sup>c</sup>

Junli Ren,<sup>a,\*</sup>

<sup>a</sup>State Key Laboratory of Pulp and Paper Engineering, School of Light Industry and  
Engineering, South China University of Technology, Guangzhou 510640, China

<sup>b</sup>School of Chemistry and Chemical Engineering, South China University of  
Technology, Guangzhou 510640, China.

<sup>c</sup>Beijing Key Laboratory of Lignocellulosic Chemistry, Beijing Forestry University,  
Beijing, 100083, China

\*Corresponding Author's E-mail: renjunli@scut.edu.cn

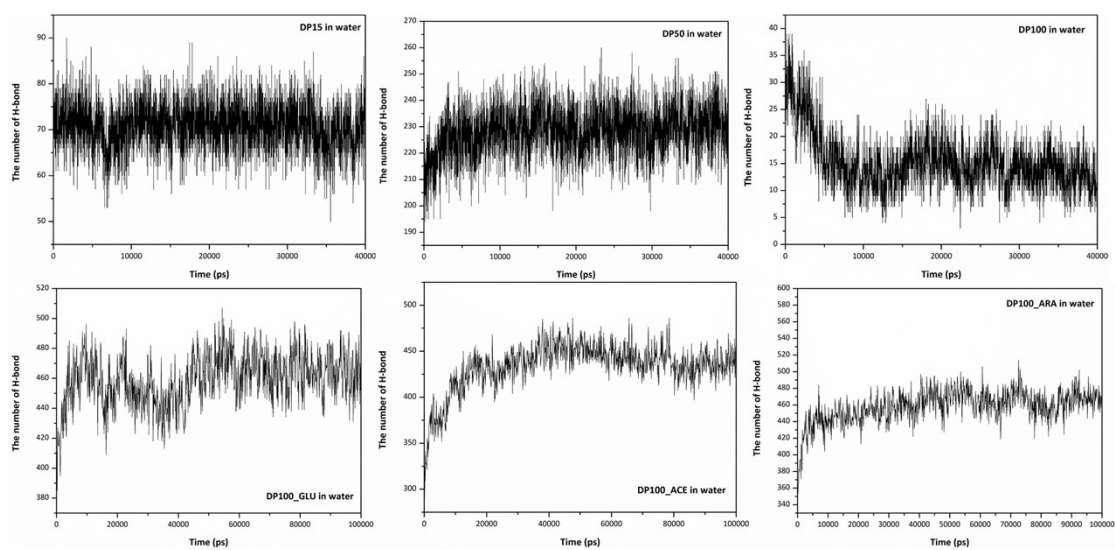

**Figure S1.** The number of H-bond between xylan (DP15, DP50, DP100, DP100\_GLU, DP100\_ACE, and DP100\_ARA) and water

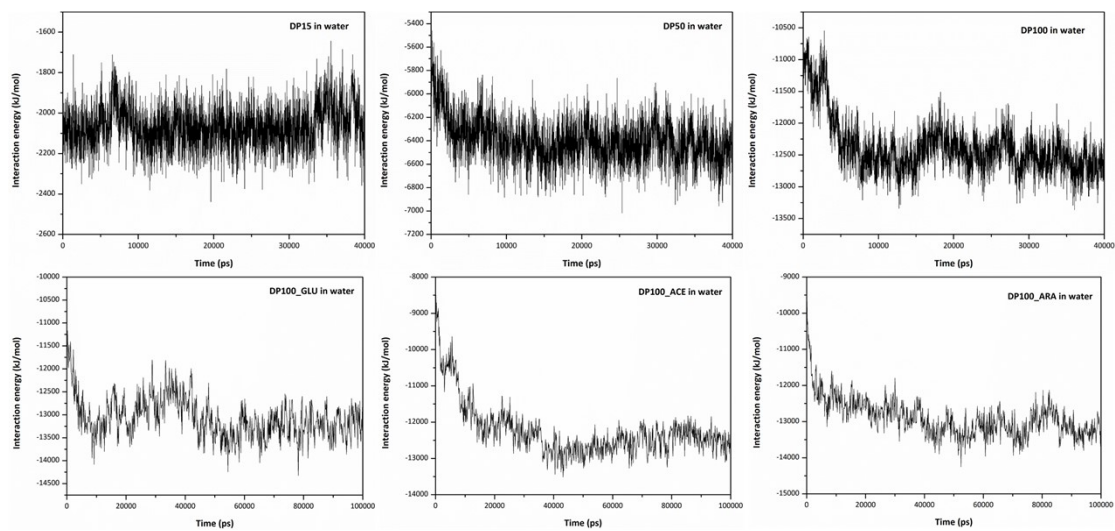

**Figure S2.** The interaction energy between xylan (DP15, DP50, DP100, DP100\_GLU, DP100\_ACE, and DP100\_ARA) and water

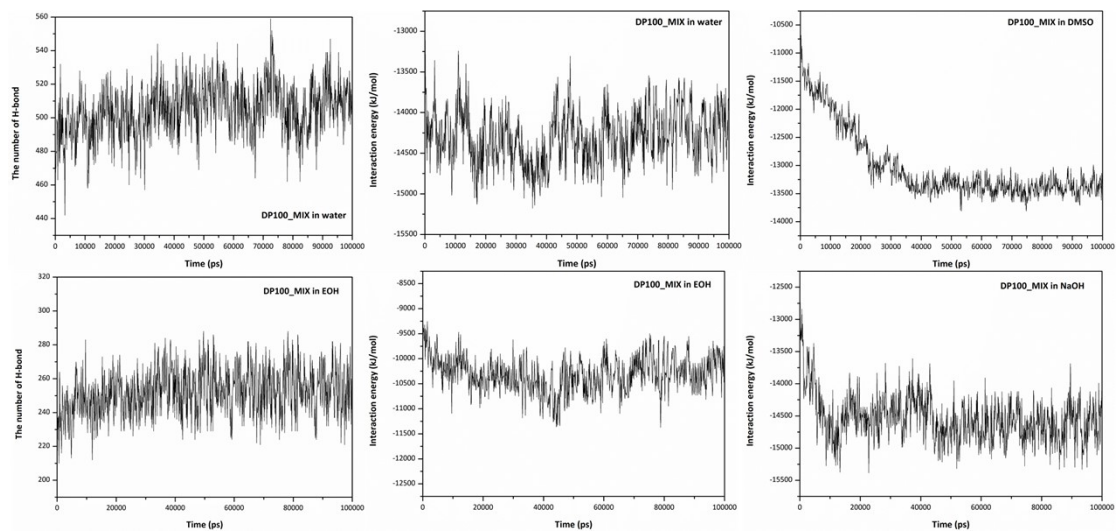

**Figure S3.** The interaction energy and the number of H-bond between xylan (DP100\_MIX) and solvent (water, ethanol, DMSO, and NaOH solution)

**Table S1** The number of hydrogen bond and interaction energy of DP15 and DP100\_MIX in water and ethanol

|                             |                | <b>DP15</b>  |              | <b>DP100_MIX</b> |             |
|-----------------------------|----------------|--------------|--------------|------------------|-------------|
|                             |                | In water     | In ethanol   | In water         | In ethanol  |
| Interaction energy (kJ/mol) | 3Xylan-3Xylan  | -12887±112   | -13521±148   | -85789±742       | -87982±679  |
|                             | 3Xylan-solvent | -6259.4±31.1 | -4407.7±24.7 | -43794±289       | -31983±194  |
|                             | Xylan①-Xylan①  | -4268.1±36.0 | -4400.5±17.8 | -28858±155       | -29162±171  |
|                             | Xylan①-Xylan②  | -1.4±0.2     | -55.4±4.2    | 0                | -0.003±5E-4 |
|                             | Xylan①-Xylan③  | -3.5±0.6     | -66.8±8.7    | 0                | -0.05±0.003 |
|                             | Xylan②-Xylan②  | -4269.2±15.3 | -4385.6±29.5 | -28625±208       | -29549±214  |
|                             | Xylan②-Xylan③  | -11.8±0.8    | -195.4±5.6   | 0                | -105.5±3.8  |
|                             | Xylan③-Xylan③  | -4271.1±35.7 | -4367.0±29.4 | -28306±164       | -29167±123  |
| Hydrogen bond               | 3Xylan-3Xylan  | 5.6±0.1      | 25.2±1.4     | 55.6±6.4         | 160.5±7.6   |
|                             | 3Xylan-solvent | 216.3±8.6    | 102.1±2.6    | 1513.6±20.1      | 761.6±10.7  |
|                             | Xylan①-Xylan①  | 1.8±0.2      | 7.1±0.4      | 19.1±1.5         | 54.3±6.3    |
|                             | Xylan①-Xylan②  | 0.004±7E-4   | 1.3±0.2      | 0                | 0           |
|                             | Xylan①-Xylan③  | 0.09±0.004   | 1.5±0.1      | 0                | 0           |
|                             | Xylan②-Xylan②  | 1.8±0.1      | 6.5±0.5      | 18.2±1.5         | 51.4±3.5    |
|                             | Xylan②-Xylan③  | 0.2±0.01     | 3.4±0.4      | 0                | 2.9±0.5     |
|                             | Xylan③-Xylan③  | 1.7±0.1      | 5.5±0.6      | 18.4±1.0         | 52.0±4.5    |

-----  
Xylan<sup>③</sup>

**Table S2** Force-field parameters for all species

| Species         | Atom | q (e) | $\epsilon$ (kJ/mol) | $\sigma$ (nm)   | Source                                   |
|-----------------|------|-------|---------------------|-----------------|------------------------------------------|
| Na <sup>+</sup> | Na   | 1     | 0.132754039         | 0.262815122     | DOI:<br>10.1021/ct500918t <sup>[1]</sup> |
| Hydronium       | H    | 0.32  | 0.50208             | 0.302905564168  | CHARMM36 force<br>field                  |
|                 | O    | -1.32 | 0.192464            | 0.0400013524445 |                                          |

[1] Pengfei Li, Lin Frank Song, and Kenneth M. Merz, Jr. Systematic Parameterization of Monovalent Ions Employing the Nonbonded Model. *J. Chem. Theory Comput.* 2015, 11, 4, 1645–1657. DOI: 10.1021/ct500918t
